# Supplementary material for: Mid-Luteal Progesterone Is Inversely Associated with Premenstrual Food Cravings
Source: MDPI journal article supplement (doi:10.3390/nu15051097), 2023-02-22

Supplementary Figures S1 a-e. QQ plots of the five-step hierarchical linear regression modeling

Step 1 (Supplementary Figure S1 a)

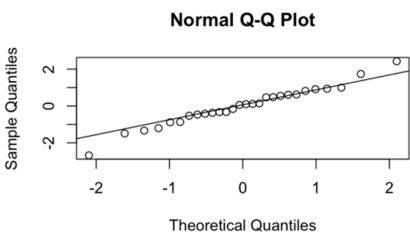

Step 2 (Supplementary Figure S1 b)

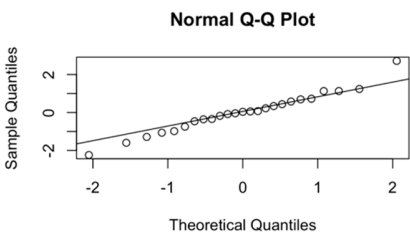

Step 3 (Supplementary Figure S1 c)

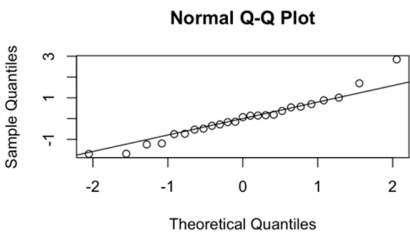

Step 4 (Supplementary Figure S1 d)

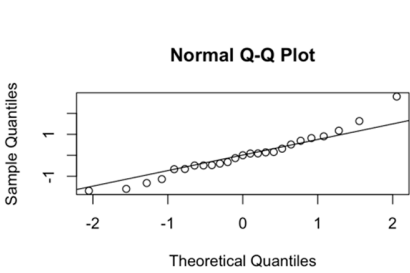

Step 5 (Supplementary Figure S1 e)

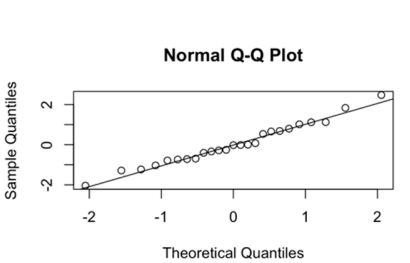

Supplement: s1 [file s1]
